# Supplementary material for: Prioritization of candidate disease genes by enlarging the seed set and fusing information of the network topology and gene expression
Source: Royal Society of Chemistry journal article supplement (doi:10.1039/c3mb70588a), 2014-02-10
Supplement: c3mb70588a1.pdf [file c3mb70588a1.pdf]

**Table S1-1 Databases of Gene expression profile for 10 diseases**

| Diseases                                           | Accession number | Disease Samples | Health samples |
|----------------------------------------------------|------------------|-----------------|----------------|
| Adrenoleukodystrophy                               | GSE34308         | 4               | 6              |
| Alzheimer Disease                                  | GDS2795          | 10              | 10             |
| Denotes Arrhythmogenic right ventricular dysplasia | GSE29819         | 6               | 6              |
| Bladder Cancer                                     | GSE31189         | 40              | 52             |
| Breast cancer                                      | GDS3952          | 31              | 51             |
| Cornelia de Lange syndrome                         | GSE12408         | 16              | 18             |
| Dilated cardiomyopathy                             | GSE29819         | 7               | 6              |
| Ectodermal dysplasia                               | GSE16524         | 4               | 4              |
| Hypercholesterolemia                               | GSE6054          | 6               | 13             |
| Lung cancer                                        | GSE23066         | 5               | 5              |

**Table S1-2 Information of 97 known causative genes associated with 10 diseases**

| Disease family       | OMIM ID | Gene Symbol | Gene Loci     |
|----------------------|---------|-------------|---------------|
| Adrenoleukodystrophy | 300371  | ABCD1       | Xq28          |
|                      | 602136  | PEX1        | 7q21.2        |
|                      | 602859  | PEX10       | 1p36.32       |
|                      | 601789  | PEX13       | 2p16.1        |
|                      | 608666  | PEX26       | 22q11.21      |
| Alzheimer Disease    | 104760  | APP         | 21q21         |
|                      | 107741  | APOE        | 19q13.2       |
|                      | 235200  | BMP2        | 6p21.3        |
|                      | 104311  | PSEN1       | 14q24.3       |
|                      | 600759  | PSEN2       | 1q31-q42      |
|                      | 602710  | APBB2       | 4p14          |
|                      | 235200  | HFE         | 6p21.3        |
|                      | 163729  | NOS3        | 7q36          |
|                      | 191840  | PLAU        | 10q24         |
|                      | 602005  | SORL1       | 11q23.2-q24.2 |
|                      | 103950  | A2M         | 12p13.3-p12.3 |
|                      | 602403  | BLMH        | 17q11.2       |
|                      | 606989  | MPO         | 17q23.1       |
| 608254               | PAXIP1  | 7q36        |               |
| ARVD                 | 190230  | TGFB3       | 14q24.3       |
|                      | 180902  | RYR2        | 1q43          |
|                      | 125647  | DSP         | 6p24.3        |
|                      | 602861  | PKP2        | 12p11.21      |
|                      | 125671  | DSG2        | 18q12.1       |
|                      | 125645  | DSC2        | 18q12.1       |
|                      | 612048  | TMEM43      | 3p25.1        |
|                      | 173325  | JUP         | 17q21.2       |
| Bladder Cancer       | 190020  | HRAS        | 11p15.5       |

|                            |        |        |              |         |
|----------------------------|--------|--------|--------------|---------|
|                            | 190070 | KRAS   | 12p12.1      |         |
|                            | 180200 | RB1    | 13q14.2      |         |
|                            | 134934 | FGFR3  | 4p16.3       |         |
|                            | 605303 | TACC3  | 4p16.3       |         |
| Breast cancer              | 164730 | AKT1   | 14q32.33     |         |
|                            | 313700 | AR     | Xq12         |         |
|                            | 607585 | ATM    | 11q22.3      |         |
|                            | 601593 | BARD1  | 2q35         |         |
|                            | 113705 | BRCA1  | 17q21.31     |         |
|                            | 600185 | BRCA2  | 13q13.1      |         |
|                            | 605882 | BRIP1  | 17q23.2      |         |
|                            | 600636 | CASP3  | 4q35.1       |         |
|                            | 192090 | CDH1   | 16q22.1      |         |
|                            | 604373 | CHEK2  | 22q12.1      |         |
|                            | 600936 | HMMR   | 5q34         |         |
|                            | 190070 | KRAS   | 12p12.1      |         |
|                            | 601937 | NCOA3  | 20q13.12     |         |
|                            | 160998 | NQO2   | 6p25.2       |         |
|                            | 610355 | PALB2  | 16p12.2      |         |
|                            | 176705 | PHB    | 17q21.33     |         |
|                            | 171834 | PIK3CA | 3q26.32      |         |
|                            | 605100 | PPM1D  | 17q23.2      |         |
|                            | 603615 | RAD54L | 1p34.1       |         |
|                            |        | 606837 | RB1CC1       | 8q11.23 |
|                            | 191170 | TP53   | 17p13.1      |         |
|                            | 601387 | TSG101 | 11p15.1      |         |
|                            | 600675 | XRCC3  | 14q32.33     |         |
|                            | 602967 | ZNF217 | 20q13.2      |         |
| Cornelia de Lange syndrome | 608667 | NIPBL  | 5p13.2       |         |
|                            | 300269 | HDAC8  | Xq13.1       |         |
|                            | 606462 | RAD21  | 8q24.11      |         |
| Dilated cardiomyopathy     | 150330 | LMNA   | 1q22         |         |
|                            | 191045 | TNNT2  | 1q32.1       |         |
|                            | 600163 | SCN5A  | 3p22.2       |         |
|                            | 188840 | TTN    | 2q31.2       |         |
|                            | 125660 | DES    | 2q35         |         |
|                            | 601411 | SGCD   | 5q33.2-q33.3 |         |
|                            | 600824 | CSRP3  | 11p15.1      |         |
|                            | 604488 | TCAP   | 17q12        |         |
|                            | 601439 | ABCC9  | 12p12.1      |         |
|                            | 172405 | PLN    | 6q22.31      |         |
|                            |        | 160760 | MYH7         | 14q11.2 |
|                            |        | PSEN1  | PSEN1        | 14q24.2 |
|                            | 600759 | PSEN2  | 1q42.13      |         |

|                      |        |         |              |
|----------------------|--------|---------|--------------|
|                      | 600958 | MYBPC3  | 11p11.2      |
|                      | 605906 | LDB3    | 10q23.2      |
|                      | 300394 | TAZ     | Xq28         |
|                      | 300377 | DMD     | Xp21.2-p21.1 |
| Ectodermal dysplasia | 604095 | EDAR    | 2q12.3       |
|                      | 606603 | EDARADD | 1q42-q43     |
| Hypercholesterolemia | 609708 | LPL     | 8p21.3       |
|                      | 606945 | LDLR    | 19p13.2      |
|                      | 107730 | APOB    | 2p24.1       |
|                      | 107670 | APOA2   | 1q23.3       |
|                      | 600564 | ITIH4   | 3p21.1       |
|                      | 600946 | GHR     | 5p13-p12     |
|                      | 132811 | EPHX2   | 8p21.2-p21.1 |
| Lung cancer          | 600046 | ABCA1   | 9q31.1       |
|                      | 191170 | TP53    | 17p13.1      |
|                      | 190070 | KRAS    | 12p12.1      |
|                      | 164757 | BRAF    | 7q34         |
|                      | 131550 | EGFR    | 7p11.2       |
|                      | 601763 | CASP8   | 2q33.1       |
|                      | 605082 | RASSF1  | 3p21.31      |
|                      | 171834 | PIK3CA  | 3q26.32      |
|                      | 147575 | IRF1    | 5q31.1       |
|                      | 609413 | ERCC6   | 10q11.23     |
|                      | 603113 | PPP2R1B | 11q23.1      |
|                      | 164870 | ERBB2   | 17q12        |
